# Supplementary material
Source: PubMed Central journal article supplement (PMC3548037)

**The Prodomain of *Bordetella* FhaB, a Prototypical Two-Partner Secretion Pathway Protein, Remains Intracellular yet Affects the Conformation of the Extracellularly-Located Mature C-terminal Domain**

**Christopher R. Noël<sup>1,2</sup>, Joseph Mazar<sup>3,§</sup>, Jeffrey A. Melvin<sup>1</sup>, Jessica A. Sexton<sup>3,¶</sup>,  
Peggy A. Cotter<sup>1,2,3,\*</sup>**

**SUPPLEMENTARY INFORMATION**

**Supplemental Figure Legends**

Supplemental Figure 1

Model of the FhaB/FhaC Two-Partner Secretion (TPS) system. (A) FhaB translocation across the *Bordetella* outer membrane. The FhaB preproprotein (labeled) is exported into the periplasm by the general secretory system (not shown). It is not known if the entire polypeptide is translocated into the periplasm before translocation through FhaC occurs. In this figure, the peptidoglycan layer and cytoplasmic membrane are not shown for simplicity. Also note that this figure was drawn to scale, as best as possible. Residue numbers of the FhaB proprotein are indicated. The FhaB TPS domain (orange) interacts with FhaC (purple) to initiate outer membrane translocation of FhaB as a hairpin. Upon extracellular exposure, the C-terminal portion of the TPS domain folds into a  $\beta$ -helix, nucleating folding of the  $\beta$ -helical shaft (blue) in an N- to C-terminal direction. At this point, FHA biogenesis could proceed by two routes, depending on the localization of the prodomain. (B) Possibility that the prodomain remains intracellular. After the MCD (light green) has reached the cell surface, SphB1 (yellow) and an unidentified protease (dark

green) cleave the intracellular prodomain (red) from FhaB and the prodomain is rapidly degraded. Mature FHA (labeled) can be either surface-associated or released. The mechanism for release is unknown. (C) Possibility that the prodomain reaches the extracellular space. In this scenario, prodomain cleavage and degradation would both occur extracellularly.

#### Supplemental Figure 2

The FhaB prodomain comprises distinct subdomains. At top is a schematic of *B. bronchiseptica* FhaB showing domain locations. At bottom, WebLogo 3.1 display of homology shared amongst TpsA proteins to the ~125 aa *B. bronchiseptica* FhaB prodomain N-terminus (PNT).

#### Supplemental Figure 3

Insertion of an HA epitope tag before the FhaB proline-rich region (PRR) does not affect FHA maturation or function. (A) Schematic of FhaB proteins used in experiment. Domain layout is the same as that of Figure 1A. The PRR in front of which the HA tag was introduced is labeled for the HAPRR strain. (B) Anti-MCD and anti-HA immunoblot of whole-cell lysates and concentrated supernatants. Introducing an HA tag at the C-terminus of FhaB causes instability of full-length FhaB. Moving the epitope upstream of the PRR does not affect the integrity or maturation of full-length FhaB. FHA release into the supernatants is unaffected by either location of the HA tag.

#### Supplemental Figure 4

Introduction of an HA tag to the FhaB prodomain suggests an intracellularly-localized prodomain. (A) Schematic of FhaB proteins used in experiment. Domain layout is the same as that of Figure 1A. (B) At the top, anti-MCD and anti-HA immuno-dot-blot of HAPRR and RBX11 strains. Normalized amounts of whole cells and boiled lysates were applied. Below, illustrations of immuno-stained samples. Layout of these illustrations is as described in Figure 5B.

### Supplemental Figure 5

A small amount of prodomain is released from *B. bronchiseptica* with a deletion of the MCT. (A) Schematic of FhaB proteins used in experiment. Domain layout is the same as that of Figure 3A. (B) Anti-MCD and anti-HA immunoblot of concentrated supernatants. On the left is a merge showing release of prodomain from HA- $\Delta$ CS, HA- $\Delta$ MCT, and HA- $\Delta$ PNT strain. On the right is an image of the same immunoblot, with the 700 nm (red) channel isolated and enhanced to facilitate the visualization of prodomain bands released into the supernatant of the  $\Delta$ MCT strain.

### Strain list

| Strain name                 | Description                                                                                                | Reference              |
|-----------------------------|------------------------------------------------------------------------------------------------------------|------------------------|
| RBX11                       | RB50 containing a deletion of codons 4-3203 of <i>fhaS</i>                                                 | (Julio & Cotter, 2005) |
| RBX11 $\Delta$ <i>sphB1</i> | RB50 containing a deletion of codons 4-3203 of <i>fhaS</i> and a deletion of codons 5-1035 of <i>sphB1</i> | This work              |
| RBX20                       | RB50 containing a deletion of codons 4-3705 of <i>fhaB</i> and a deletion of codons 4-3203 of <i>fhaS</i>  | (Julio & Cotter, 2005) |
| CTHA                        | RBX11 containing nine codons encoding                                                                      | This work              |

|                             |                                                                                                                                                      |           |
|-----------------------------|------------------------------------------------------------------------------------------------------------------------------------------------------|-----------|
|                             | the HA epitope (YPYDVPDYA) following codon 3703 in <i>fhaB</i>                                                                                       |           |
| HAPRR                       | RBX11 containing nine codons encoding the HA epitope (YPYDVPDYA) following codon 3375 in <i>fhaB</i>                                                 | This work |
| HAPRR $\Delta$ <i>sphB1</i> | RBX11 containing nine codons encoding the HA epitope (YPYDVPDYA) following codon 3375 in <i>fhaB</i> and a deletion of codons 5-1035 of <i>sphB1</i> | This work |
| BPSMAQ                      | Bp strain containing His7 following Q72 and AcTEV following Y1871 in FhaB                                                                            | This work |
| BPSMAQT-N                   | Bp strain with His7 at Q72, AcTEV at Y1871, truncated at aa 2330, complemented to aa 2410                                                            | This work |
| JS20                        | RBX11 with a stop codon after bp 5943                                                                                                                |           |
| JS26                        | JS20::pJB51 substituting A1983C, containing codons 1815-3710 followed immediately by a stop codon                                                    | This work |
| JS55                        | JS20::pJB127 substituting A1983C, containing codons 1815-2588 followed immediately by a stop codon                                                   | This work |
| JS27                        | JS20::pJB52 substituting V2032C, containing codons 1815-3710 followed immediately by a stop codon                                                    | This work |
| JS56                        | JS20::pJB128 substituting V2032C, containing codons 1815-2588 followed immediately by a stop codon                                                   | This work |
| JS28                        | JS20::pJB53 substituting V2081C, containing codons 1815-3710 followed immediately by a stop codon                                                    | This work |
| JS57                        | JS20::pJB129 substituting V2081C, containing codons 1815-2588 followed immediately by a stop codon                                                   | This work |
| JS48                        | JS20::pJB87 substituting G2132C, containing codons 1815-3710 followed immediately by a stop codon                                                    | This work |
| JS58                        | JS20::pJB130 substituting G2132C, containing codons 1815-2588 followed immediately by a stop codon                                                   | This work |
| JS52                        | JS20::pJB93 substituting A2182C, containing codons 1815-3710 followed immediately by a stop codon                                                    | This work |
| JS59                        | JS20::pJB131 substituting A2182C, containing codons 1815-2588 followed immediately by a stop codon                                                   | This work |
| JS49                        | JS20::pJB88 substituting A2233C, containing codons 1815-3710 followed immediately by a stop codon                                                    | This work |
| JS60                        | JS20::pJB132 substituting A2233C, containing codons 1815-2588 followed                                                                               | This work |

|                       |                                                                                                    |                             |
|-----------------------|----------------------------------------------------------------------------------------------------|-----------------------------|
|                       | immediately by a stop codon                                                                        |                             |
| JS51                  | JS20::pJB89 substituting L2284C, containing codons 1815-3710 followed immediately by a stop codon  | This work                   |
| JS61                  | JS20::pJB133 substituting L2284C, containing codons 1815-2588 followed immediately by a stop codon | This work                   |
| JS50                  | JS20::pJB90 substituting I2333C, containing codons 1815-3710 followed immediately by a stop codon  | This work                   |
| JS62                  | JS20::pJB134 substituting I2333C, containing codons 1815-2588 followed immediately by a stop codon | This work                   |
| JS53                  | JS20::pJB94 substituting A2382C, containing codons 1815-3710 followed immediately by a stop codon  | This work                   |
| JS63                  | JS20::pJB135 substituting A2382C, containing codons 1815-2588 followed immediately by a stop codon | This work                   |
| JS54                  | JS20::pJB95 substituting A2432C, containing codons 1815-3710 followed immediately by a stop codon  | This work                   |
| JS64                  | JS20::pJB136 substituting A2432C, containing codons 1815-2588 followed immediately by a stop codon | This work                   |
| HA-ΔCS                | RBX11-HAPRR containing a deletion of codons 2217-2647                                              | This work                   |
| HA-ΔCSΔ <i>sphB1</i>  | RBX11-HAPRR Δ <i>sphB1</i> containing a deletion of codons 2217-2647                               | This work                   |
| HA-ΔMCT               | RBX11-HAPRR containing deletion of codons 2217-2471                                                | This work                   |
| HA-ΔMCTΔ <i>sphB1</i> | RBX11-HAPRR Δ <i>sphB1</i> containing deletion of codons 2217-2471                                 | This work                   |
| HA-ΔPNT               | RBX11-HAPRR containing deletion of codons 2472-2647                                                | This work                   |
| HA-ΔPNTΔ <i>sphB1</i> | RBX11-HAPRR Δ <i>sphB1</i> containing deletion of codons 2472-2647                                 | This work                   |
| DH5α                  | <i>E. coli</i> molecular cloning strain                                                            | BRL; Gaithersburg, MD       |
| SM10λpir              | Conjugation strain                                                                                 | (Miller & Mekalanos, 1988)  |
| RHO3                  | Conjugation strain                                                                                 | (López <i>et al</i> , 2009) |

### Plasmid list

| Plasmid name | Description | Reference |
|--------------|-------------|-----------|
|--------------|-------------|-----------|

|                             |                                                                                                                                                                                                                                                       |                                          |
|-----------------------------|-------------------------------------------------------------------------------------------------------------------------------------------------------------------------------------------------------------------------------------------------------|------------------------------------------|
| pEG7                        | Suicide plasmid used to construct <i>B. pertussis</i> and <i>B. bronchiseptica</i> strains containing co-integrates                                                                                                                                   | (Akerley <i>et al</i> , 1995)            |
| pEG7S                       | <i>sacB</i> -containing allelic exchange plasmid used to construct <i>B. bronchiseptica</i> strains                                                                                                                                                   | (Martínez de Tejada <i>et al</i> , 1996) |
| pEG7S- $\Delta sphB1$       | pEG7S derivative used to introduce the $\Delta sphB1$ deletion mutation into <i>B. bronchiseptica</i> strains                                                                                                                                         | (Mazar & Cotter, 2006)                   |
| pEG7-CTHA                   | pEG7 derivative containing nucleotides corresponding to codons 3429-3710 followed immediately by a stop codon and then 500 bp corresponding to the region immediately 3' of <i>fhaB</i> with nucleotides encoding the HA epitope following codon 3703 | This work                                |
| pSS4245                     | pBR322-based allelic exchange plasmid for use in <i>Bordetella</i> species. Contains I-SceI cleavage site and encodes restriction endonuclease, I-SceI, under the control of the pertussis toxin ( <i>ptx</i> ) promoter                              | (Inatsuka <i>et al</i> , 2010)           |
| pSS4245-HAPRR               | pSS4245 derivative containing nucleotides corresponding to codons 3208-3567 with nucleotides encoding the HA epitope following codon 3375                                                                                                             | This work                                |
| pSORTP1-Bp MCI/Y1871/AcTEV  | Bp mating vector for Y1871AcTEV mutagenesis in <i>FhaB</i>                                                                                                                                                                                            | This work                                |
| pSORTP1-SS Template/Q72His7 | Bp mating vector for Q72His7 mutagenesis in <i>FhaB</i>                                                                                                                                                                                               | This work                                |
| pJB48                       | pEG7 derivative containing nucleotides corresponding to codons 1814-3710 of <i>fhaB</i> followed immediately by a stop codon                                                                                                                          | This work                                |
| pJB101                      | pEG7 derivative containing nucleotides corresponding to codons 1814-2588 of <i>fhaB</i> followed immediately by a stop codon                                                                                                                          | This work                                |
| pJB28                       | pCR2.1 derivative containing nucleotides 5441-7410 of <i>fhaB</i> . Used for QuickChange substitutions. QuickChange derivatives were subcloned into pJB48 and pJB101.                                                                                 | This work                                |
| pJB51                       | pJB48 in which codon 1983 has been changed to encode Cys instead of Ala                                                                                                                                                                               | This work                                |
| pJB127                      | pJB101 in which codon 1983 has been changed to encode Cys instead of Ala                                                                                                                                                                              | This work                                |
| pJB52                       | pJB48 in which codon 2032 has been changed to encode Cys instead of Val                                                                                                                                                                               | This work                                |

|                       |                                                                                                          |           |
|-----------------------|----------------------------------------------------------------------------------------------------------|-----------|
| pJB128                | pJB101 in which codon 2032 has been changed to encode Cys instead of Val                                 | This work |
| pJB53                 | pJB48 in which codon 2081 has been changed to encode Cys instead of Val                                  | This work |
| pJB129                | pJB101 in which codon 2081 has been changed to encode Cys instead of Val                                 | This work |
| pJB87                 | pJB48 in which codon 2132 has been changed to encode Cys instead of Gly                                  | This work |
| pJB130                | pJB101 in which codon 2132 has been changed to encode Cys instead of Gly                                 | This work |
| pJB93                 | pJB48 in which codon 2182 has been changed to encode Cys instead of Ala                                  | This work |
| pJB131                | pJB101 in which codon 2182 has been changed to encode Cys instead of Ala                                 | This work |
| pJB88                 | pJB48 in which codon 2233 has been changed to encode Cys instead of Ala                                  | This work |
| pJB132                | pJB101 in which codon 2233 has been changed to encode Cys instead of Ala                                 | This work |
| pJB89                 | pJB48 in which codon 2284 has been changed to encode Cys instead of Leu                                  | This work |
| pJB133                | pJB101 in which codon 2284 has been changed to encode Cys instead of Leu                                 | This work |
| pJB90                 | pJB48 in which codon 2333 has been changed to encode Cys instead of Ile                                  | This work |
| pJB134                | pJB101 in which codon 2333 has been changed to encode Cys instead of Ile                                 | This work |
| pJB94                 | pJB48 in which codon 2382 has been changed to encode Cys instead of Ala                                  | This work |
| pJB135                | pJB101 in which codon 2382 has been changed to encode Cys instead of Ala                                 | This work |
| pJB95                 | pJB48 in which codon 2432 has been changed to encode Cys instead of Ala                                  | This work |
| pJB136                | pJB101 in which codon 2432 has been changed to encode Cys instead of Ala                                 | This work |
| pSS4245- $\Delta$ CS  | pSS4245 derivative containing nucleotides corresponding to codons 2048-2216 and 2648-2808 of <i>fhaB</i> | This work |
| pSS4245- $\Delta$ MCT | pSS4245 derivative containing nucleotides corresponding to codons 2048-2216 and 2472-3640 of <i>fhaB</i> | This work |
| pSS4245- $\Delta$ PNT | pSS4245 derivative containing nucleotides corresponding to codons 2295-2471 and 2648-2808 of <i>fhaB</i> | This work |

## Strain construction

RBX11 $\Delta sphB1$  was constructed by performing allelic exchange on RBX11 using plasmid pEG7S $\Delta sphB1$  as described (Martínez de Tejada *et al*, 1996). The strain was confirmed to be constructed as intended by PCR and nucleotide sequence analysis.

HAPRR and HAPRR $\Delta sphB1$  were constructed by performing allelic exchange on RBX11 and RBX11 $\Delta sphB1$ , respectively, using plasmid pSS4245-HAPRR as described (Inatsuka *et al*, 2010). The strains were confirmed to be constructed as intended by PCR and nucleotide sequence analysis.

HA- $\Delta CS$  and HA- $\Delta CS\Delta sphB1$  were constructed by performing allelic exchange on HAPRR and HAPRR $\Delta sphB1$ , respectively, using plasmid pSS4245- $\Delta CS$ . The strains were confirmed to be constructed as intended by PCR and nucleotide sequence analysis.

HA- $\Delta MCT$  and HA- $\Delta MCT\Delta sphB1$  were constructed by performing allelic exchange on HAPRR and HAPRR $\Delta sphB1$ , respectively, using plasmid pSS4245- $\Delta MCT$ . The strains were confirmed to be constructed as intended by PCR and nucleotide sequence analysis.

HA- $\Delta PNT$  and HA- $\Delta PNT\Delta sphB1$  were constructed by performing allelic exchange on HAPRR and HAPRR $\Delta sphB1$ , respectively, using plasmid pSS4245- $\Delta PNT$ . The strains were confirmed to be constructed as intended by PCR and nucleotide sequence analysis.



BPSMAQ was constructed by performing allelic exchange on BPSM using plasmids pSORTP1-Bp MCI/Y1871/AcTEV and pSORTP1-SS Template/Q72His7. The strains were confirmed to be constructed as intended by PCR and nucleotide sequence analysis

BPSMAQT-N was constructed by introducing pEG7-FI1a/C&R-N into BPSMAQ by conjugation and selecting co-integrates on BG-Sm-Gm agar as described (Akerley *et al*, 1995) Integration of plasmids at the correct site in the chromosome was confirmed by PCR.

CTHA was constructed by introducing pEG7-CTHA into RBX11 by conjugation and selecting co-integrates on BG-Sm-Gm agar. Integration of the plasmids at the correct site in the chromosome was confirmed by PCR.

JS26, JS55, JS27, JS56, JS28, JS57, JS48, JS58, JS52, JS59, JS49, JS60, JS51, JS61, JS50, JS62, JS53, JS63, JS54, and JS64 were constructed by introducing pJB51, pJB127, pJB52, pJB128, pJB53, pJB129, pJB87, pJB130, pJB93, pJB131, pJB88, pJB132, pJB89, pJB133, pJB90, pJB134, pJB94, pJB135, pJB95, and pJB136, respectively, into JS20 by conjugation and selecting co-integrates on BG-Sm-Gm agar. Integration of the plasmids at the correct site in the chromosome was confirmed by PCR.

### **Plasmid construction**

pJB28 is a pCR2.1 derivative that contains a PCR-amplified 2.0 kb fragment of RBX11 *fhaB* (corresponding to codons 1814 through 2470).

The following plasmids are pEG7 derivatives used to construct co-integrate strains. Sequences cloned into this plasmid between the gentamicin resistance gene and ampicillin resistance gene are described.

pJB48 contains PCR-amplified 2.0 kb, and 3.8 kb fragments of RBX11 *fhaB* (corresponding to codons 1814 through 2470 and codons 2471-3710 followed by a STOP codon) from RBX11 ligated together.

pJB101 contains PCR-amplified 2.0 kb, and 350 bp fragments of RBX11 *fhaB* (corresponding to codons 1814 through 2470 and codons 2471-2588 followed by a STOP codon) from RBX11 ligated together.

pJB51, pJB52, pJB53, pJB87, pJB93, pJB88, pJB89, pJB90, pJB94 and pJB95 contain PCR-amplified 2.0 kb, and 3.8 kb fragments of RBX11 *fhaB* (corresponding to codons 1814 through 2470 and codons 2471-3710 followed by a STOP codon) from RBX11 ligated together with a QuickChange mutagenesis of the residues specified in plasmid list.

pJB127, pJB128, pJB129, pJB130, pJB131, pJB132, pJB133, pJB134, pJB135 and pJB136 contain PCR-amplified 2.0 kb, and 350 bp fragments of RBX11 *fhaB* (corresponding to codons 1814 through 2470 and codons 2471-2588 followed by a stop codon) from RBX11 ligated together with a QuickChange mutagenesis of the residues specified in plasmid list.

pEG7-CTHA contains PCR-amplified 0.6 kb (corresponding to codons 3429 through 3703) and 0.5 kb fragments of RBX11 *fhaB* (corresponding to codon 3703 extending to

457 bp 3' of STOP codon) ligated together with nucleotides encoding an HA epitope following codon 3703.

The following plasmids are pSS4245 derivatives used for allelic exchange in *B. bronchiseptica*. Sequences cloned into this plasmid between the I-SceI cleavage site and the tetracycline resistance gene are described.

pSS4245-HAPRR contains PCR-amplified 0.5 kb (corresponding to codons 3208 through 3375) and 0.6 kb fragments of RBX11 *fhaB* (corresponding to codons 3375 through 3567) ligated together with nucleotides encoding an HA epitope following codon 3375.

pSS4245- $\Delta$ CS contains PCR-amplified 0.5 kb (corresponding to codons 2048 through 2216) and 0.5 kb fragments of RBX11 *fhaB* (corresponding to codons 2648 through 2808) ligated together.

pSS4245- $\Delta$ MCT contains PCR-amplified 0.5 kb (corresponding to codons 2048 through 2216) and 0.5 kb fragments of RBX11 *fhaB* (corresponding to codons 2472 through 2640) ligated together.

pSS4245- $\Delta$ PNT contains PCR-amplified 0.5 kb (corresponding to codons 2295 through 2471) and 0.5 kb fragments of RBX11 *fhaB* (corresponding to codons 2648 through 2808) ligated together.

The following plasmids are pSORTP1 derivatives used for allelic exchange in *B. pertussis*. Sequences cloned into this plasmid between the gentamicin resistance gene and ampicillin resistance gene are described.

pSORTP1-Bp MCI/Y1871/AcTEV contains PCR-amplified 600 bp fragments flanking the codon for Y1871 of RBX11 *fhaB* with nucleotides encoding an AcTEV cleavage site inserted following Y1871.

pSORTP1-SS Template/Q72His7 contains PCR-amplified 600 bp fragments flanking the codon for Q72 of RBX11 *fhaB* with nucleotides encoding a His7 epitope inserted following Q72.

## References

- Akerley BJ, Cotter PA & Miller JF (1995) Ectopic expression of the flagellar regulon alters development of the Bordetella-host interaction. *Cell* **80**: 611–620
- Inatsuka CS, Xu Q, Vujkovic-Cvijin I, Wong S, Stibitz S, Miller JF & Cotter PA (2010) Pertactin is required for Bordetella species to resist neutrophil-mediated clearance. *Infect. Immun.* **78**: 2901–2909
- Julio SM & Cotter PA (2005) Characterization of the filamentous hemagglutinin-like protein FhaS in Bordetella bronchiseptica. *Infect. Immun.* **73**: 4960–4971
- López CM, Rholl DA, Trunck LA & Schweizer HP (2009) Versatile dual-technology system for markerless allele replacement in Burkholderia pseudomallei. *Appl. Environ. Microbiol.* **75**: 6496–6503
- Martínez de Tejada G, Miller JF & Cotter PA (1996) Comparative analysis of the virulence control systems of Bordetella pertussis and Bordetella bronchiseptica. *Mol. Microbiol.* **22**: 895–908
- Mazar J & Cotter PA (2006) Topology and maturation of filamentous haemagglutinin suggest a new model for two-partner secretion. *Mol. Microbiol.* **62**: 641–654

Miller VL & Mekalanos JJ (1988) A novel suicide vector and its use in construction of insertion mutations: osmoregulation of outer membrane proteins and virulence determinants in *Vibrio cholerae* requires *toxR*. *J. Bacteriol.* **170**: 2575–2583

SUPPLEMENTAL FIGURE 1

A

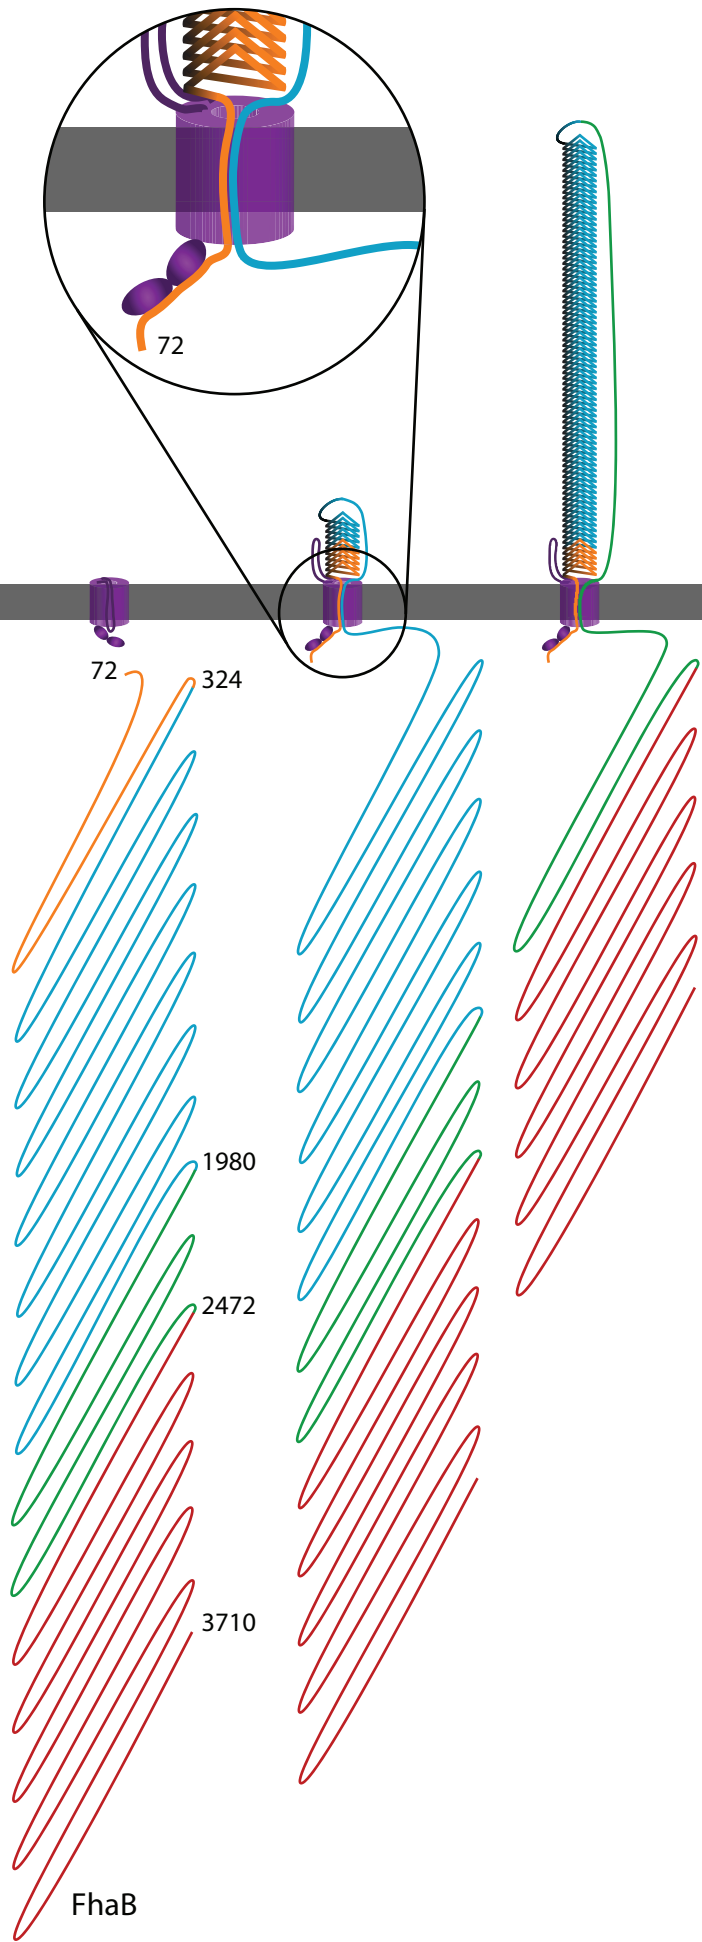

B

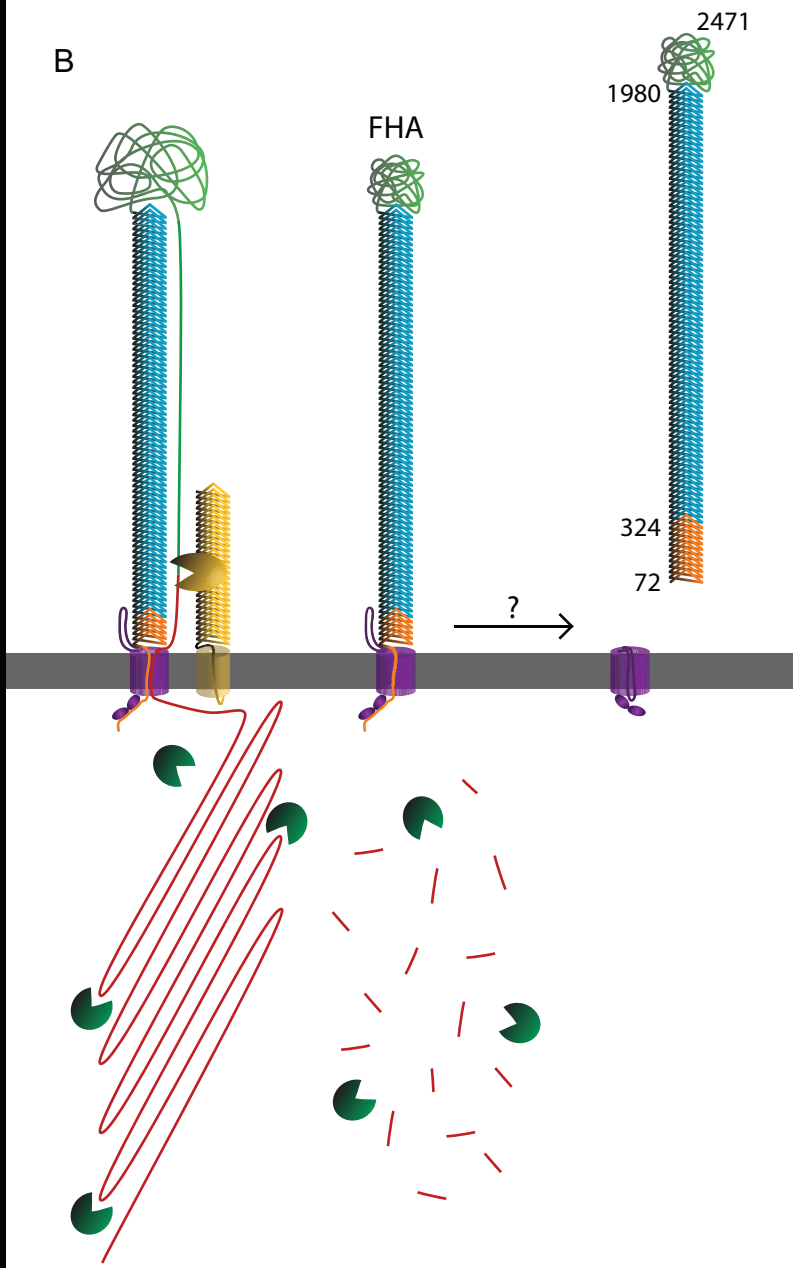

C

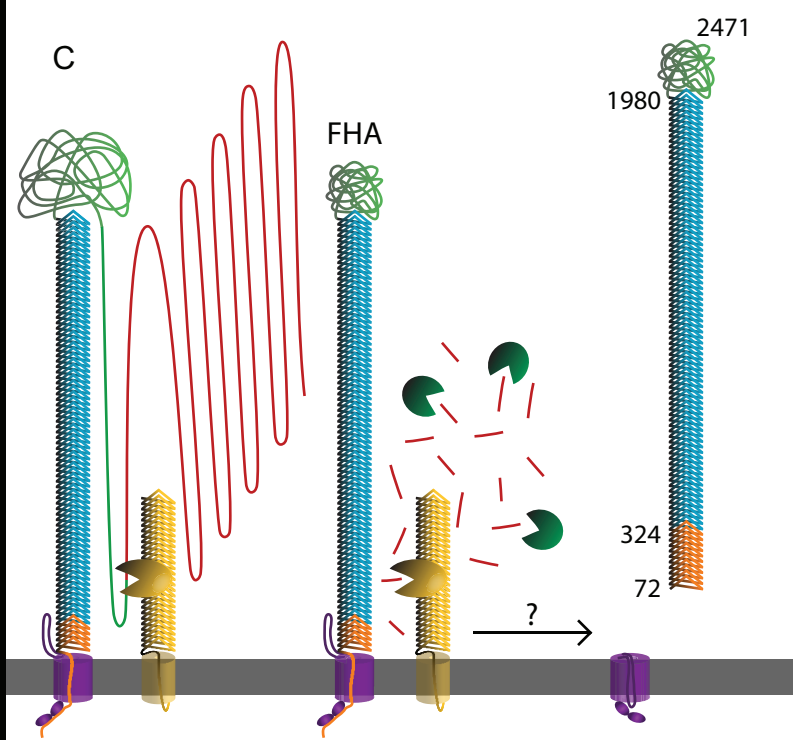

# SUPPLEMENTAL FIGURE 2

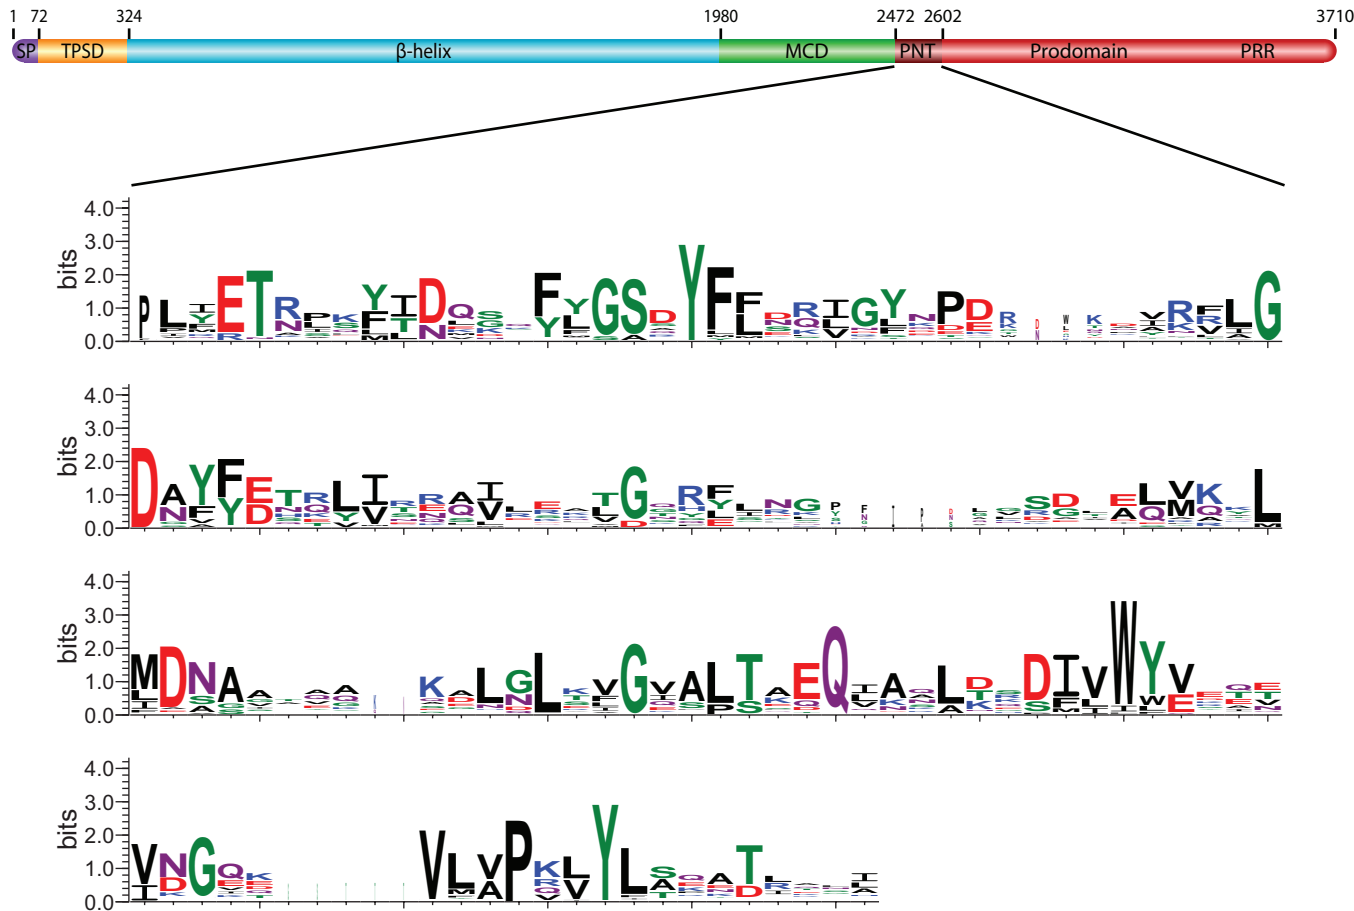

# SUPPLEMENTAL FIGURE 3

## A

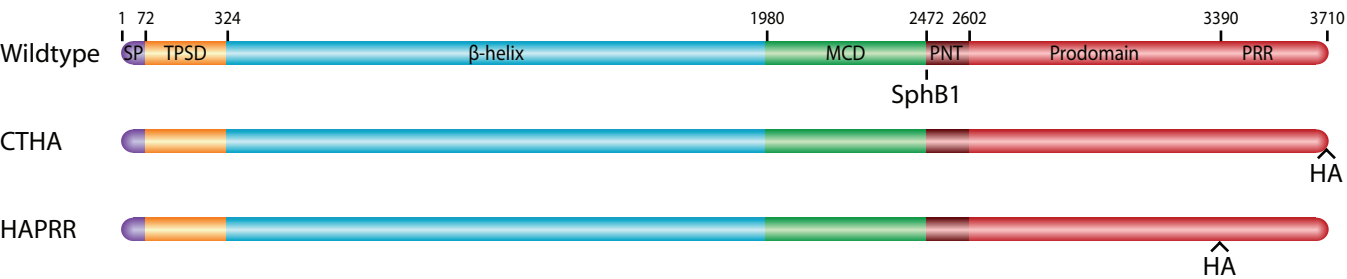

## B

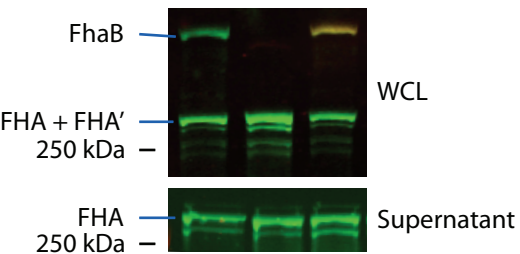



# SUPPLEMENTAL FIGURE 4

## A

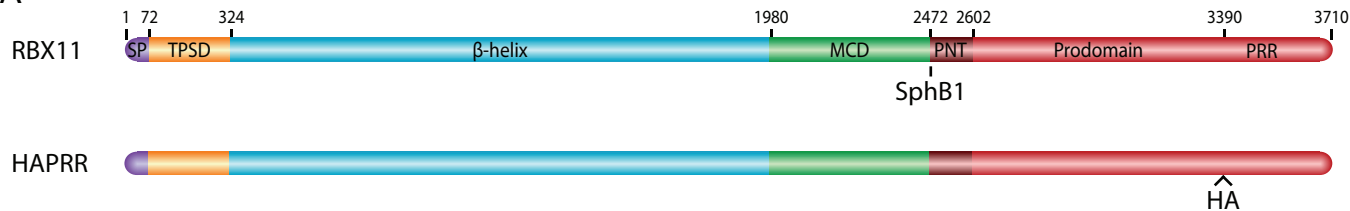

## B

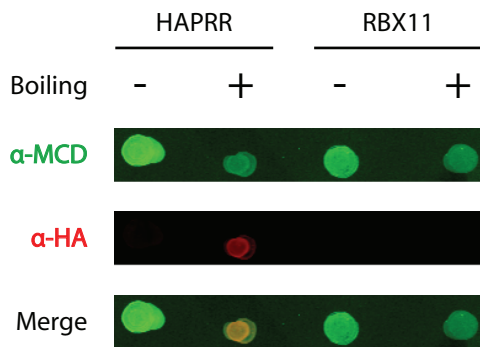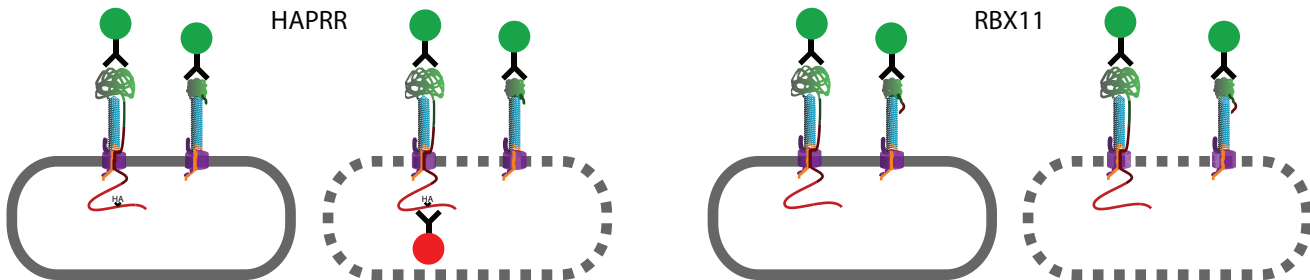

SUPPLEMENTAL FIGURE 5

A

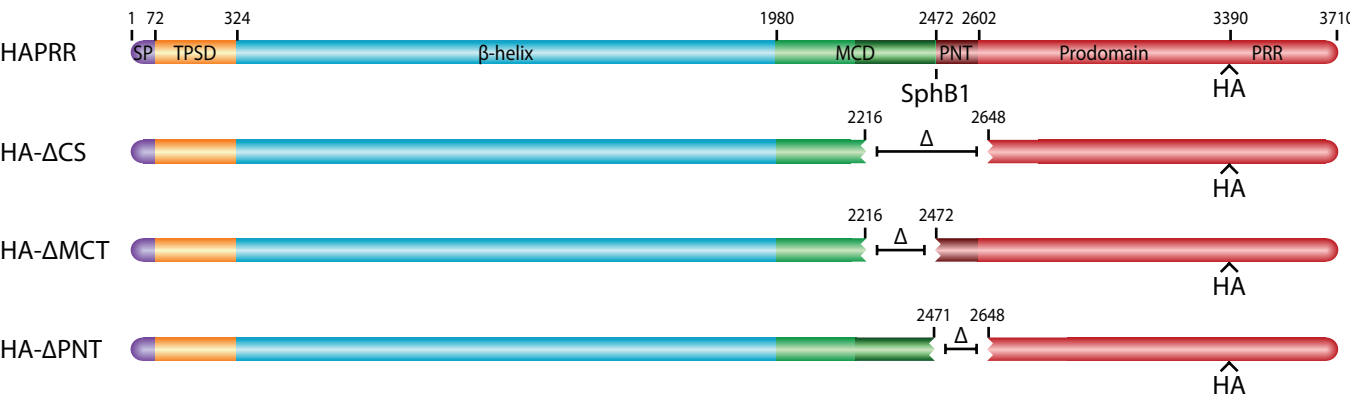

B

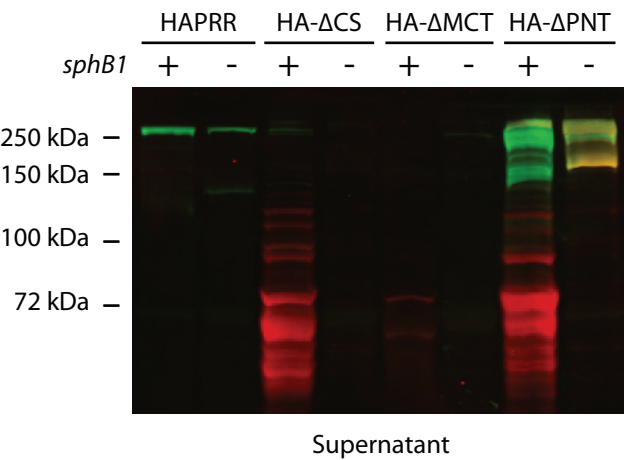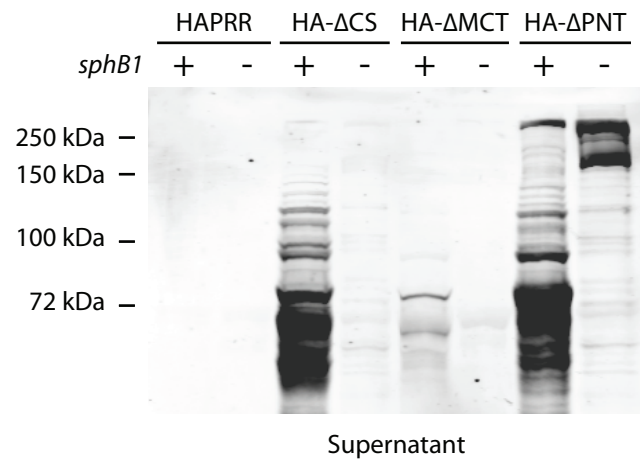

Supplement: NIHMS407668-supplement-Supp_Figure_S1-S5.pdf [file NIHMS407668-supplement-Supp_Figure_S1-S5.pdf]
